# Supplementary material
Source: Springer Nature journal article supplement (https://www.springermedizin.de/resource/supplementary/12916_2011_455_MOESM2_ESM.pdf/9599722)
Supplement: MOESM2 [file 9599722]

**Table 2** Level of physical activity in people with metabolic syndrome and hazard ratio (HR) of all-cause and cardiovascular (CVD) deaths

| PA Index                | n    | Person years | All-cause |                 |                         |         | CVD    |                 |                         |         |
|-------------------------|------|--------------|-----------|-----------------|-------------------------|---------|--------|-----------------|-------------------------|---------|
|                         |      |              | Deaths    | HR <sup>a</sup> | HR <sup>b</sup> (95%CI) | P-trend | Deaths | HR <sup>a</sup> | HR <sup>b</sup> (95%CI) | P-trend |
| <b>&lt;65 years old</b> |      |              |           |                 |                         |         |        |                 |                         |         |
| Inactive <sup>c</sup>   | 854  | 9357         | 70        | 1.0             | 1.0 (Ref.)              |         | 15     | 1.0             | 1.0 (Ref.)              |         |
| Low                     | 3750 | 41 723       | 203       | 0.62            | 0.71 (0.54 to 0.94)     |         | 61     | 0.87            | 1.03 (0.58 to 1.83)     |         |
| Moderate                | 2723 | 30 398       | 114       | 0.52            | 0.58 (0.43 to 0.79)     |         | 26     | 0.56            | 0.63 (0.33 to 1.20)     |         |
| High                    | 2556 | 28 119       | 73        | 0.46            | 0.52 (0.37 to 0.73)     |         | 17     | 0.51            | 0.60 (0.29 to 1.22)     |         |
|                         |      |              |           |                 |                         | <0.001  |        |                 |                         | 0.02    |
| <b>≥65 years old</b>    |      |              |           |                 |                         |         |        |                 |                         |         |
| Inactive <sup>c</sup>   | 686  | 5620         | 375       | 1.0             | 1.0 (Ref.)              |         | 171    | 1.0             | 1.0 (Ref.)              |         |
| Low                     | 1411 | 13 347       | 522       | 0.76            | 0.75 (0.65 to 0.86)     |         | 235    | 0.76            | 0.76 (0.62 to 0.93)     |         |
| Moderate                | 1043 | 10 157       | 361       | 0.70            | 0.65 (0.56 to 0.76)     |         | 140    | 0.61            | 0.58 (0.46 to 0.74)     |         |
| High                    | 426  | 4293         | 121       | 0.69            | 0.59 (0.47 to 0.74)     |         | 46     | 0.59            | 0.52 (0.37 to 0.73)     |         |
|                         |      |              |           |                 |                         | <0.001  |        |                 |                         | <0.001  |

<sup>a</sup> Adjusted for age (continuous)

<sup>b</sup> Adjusted for age (continuous), sex (men and women), marital status [married, unmarried, widow(er), divorced/separated], education (≤10, 11-14, ≥15 years, and unknown), alcohol consumption (frequency last two weeks: 0, 1-4, ≥5, total abstainer, and unknown), smoking status (never, former, current, and unknown), occupational activity (mostly sedentary, much walking, much walking & lifting, heavy physical work, and unknown)

<sup>c</sup> Inactive participants served as the reference group

HR, hazard ratio; CI, confidence interval; n, number of participants.
